# Supplementary material
Source: PubMed Central journal article supplement (PMC3058216)
Supplement: joa0218-0298-SD1.pdf [file joa0218-0298-SD1.pdf]

1 data from either of the two extant species should be sufficient to resolve the phylogenetic  
2 placement of genus and its divergence time from other phocid lineages.

3

4 We identified nine fossil taxa from the literature that represent the minimum age for  
5 crown clades represented in our sample (Table S2). We used the ages of these fossils as  
6 minimum age calibrations for a relaxed molecular clock, as implemented in BEAST  
7 (Drummond and Rambaut, 2007). Fossil calibrations were used to generate log-normally  
8 distributed prior ranges on divergence times for their respective nodes. In each case, the  
9 minimum age of the fossil was used as the offset value. If a range of ages was given, the  
10 mid-point of that range was used to set the median of the log-normal distribution. If no  
11 range was given, we placed the median point one million years from the offset. We then  
12 adjusted the standard deviation of the distribution so that the 95% range encompassed the  
13 minimum fossil age at the next node towards the root. In some cases, we used additional  
14 knowledge of the carnivoran fossil record to adjust distributions. For example, the  
15 minimum age reported for remains of the American black bear, *Ursus americanus*, is  
16 1.8mya (Cassiliano 1999) but the next node for which we had a fossil calibration point is  
17 the split between Ursidae and other arctoids (*Parictis*, 37 mya; Hunt 1998). Instead of  
18 specifying a fat-tailed distribution, we used the first occurrence of the genus *Ursus* (*U.*  
19 *boeckii* at 5.3mya; Montoya et al. 2006) as the 95% cut-off. Full details of nodes  
20 calibrated, fossil taxa, and age ranges allocated as prior ranges are provided in Table S2.

21

22 We partitioned our alignment by locus, with each allocated an HKY+ $\Gamma$  model of  
23 sequence evolution. We ran our analysis for 50 million generations, sampling every 1000

1 generations. After ensuring that parameters had satisfactorily converged based on trace  
2 plots of samples from the posterior distribution, we discarded the first 20% of trees as  
3 burn-in and produced a maximum-clade credibility tree from the remaining trees. Our  
4 tree (see main text) agreed well with previously published time-calibrated phylogenies  
5 (e.g. Eizerik et al. 2010; Fulton and Strobeck 2010, Koepfli et al. 2007, 2008) and was  
6 subsequently used in comparative analysis.

7

### 8 *Phylogenetic Independent Contrasts*

9

10 Regressions of phylogenetic independent contrasts of turbinate surface areas on contrasts  
11 of size measures (mass, skull length and chamber volume) are plotted in Figure S1, with  
12 regression statistics provided in Table S3. Contrasts for turbinate areas were positivized  
13 on size measurements, and regressions fit without intercepts following Garland et al.  
14 (1992). In all cases, results are broadly similar to regressions using species' values as data  
15 points.

16

1 ***Supplementary Literature Cited***

2

3 Adam PJ (2004) *Monachus tropicalis* *Mammalian Species* **747**: 1-9.

4

5 Cassiliano ML. (1999) Biostratigraphy of Blancan and Irvingtonian mammals in the Fish  
6 Creek-Vallecito Creek section, southern California, and a review of the Blancan-  
7 Irvingtonian boundary. *Journal of Vertebrate Paleontology* **19**:169-186

8

9 Drummond AJ and Rambaut A (2007) BEAST: Bayesian evolutionary analysis by  
10 sampling trees. *BMC Evolutionary Biology* **7**:214

11

12 Eizirik E, Murphy WJ., Koepfli KP et al (2010) Pattern and timing of diversification of  
13 the mammalian order Carnivora inferred from multiple nuclear gene sequences *Mol.*  
14 *Phylogenet. Evol.* **56**: 49-63

15

16 Flynn JJ, Finarelli JA, Zehr S et al (2005) Molecular phylogeny of the Carnivora  
17 (Mammalia): assessing the impact of increased sampling on resolving enigmatic  
18 relationships *Syst. Biol.* **54**: 317-337

19

20 Fulton TL, Strobeck C. (2006) Molecular phylogeny of the Arctoidea (Carnivora): effect  
21 of missing data on supertree and supermatrix analyses of multiple gene data sets. *Mol.*  
22 *Phylogenet. Evol.* **41**: 165-181

23

24 Fulton TL, Strobeck,C.(2010) Multiple fossil calibrations, nuclear loci and mitochondrial  
25 genomes provide new insight into biogeography and divergence timing for true seals  
26 (Phocidae, Pinnipedia) *J. Biogeogr.* **37**: 814-829

27

28 Garland, T Jr, Harvey PH and Ives AR (1992) Procedures for the analysis of comparative  
29 data using phylogenetically independent contrasts. *Systematic Biology* **41**:18-32.

30

31 Hunt, RM Jr (1998) Ursidae, pp. 174-195 in Janis CM, Scott KM, Jacobs LL (eds)  
32 *Evolution of Tertiary mammals of North America volume 1; Terrestrial carnivores,*  
33 *ungulates, and ungulatelike mammals.* Cambridge University Press, Cambridge UK.

34

35 Koepfli KP, Wayne RK (2003) Type I STS markers are more informative than  
36 cytochrome B in phylogenetic reconstruction of the Mustelidae (Mammalia: Carnivora).  
37 *Syst. Biol.* **52**:571-593

38

39 Koepfli KP, Gompper ME, Eizirik E et al (2007) Phylogeny of the Procyonidae  
40 (Mammalia: Carnivora): molecules,morphology and the Great American Interchange.  
41 *Mol. Phylogenet. Evol.* **43**: 1076-1095.

42

43 Koepfli KP, Kanchanasaka B, Sasaki H et al (2008) Establishing the foundation for an  
44 applied molecular taxonomy of otters in Southeast Asia *Conserv. Genet.* **9**:1589-1604

45

1 Lindblad-Toh K, Wade CM, Mikkelsen TS et al (2005) Genome sequence, comparative  
2 analysis and haplotype structure of the domestic dog. *Nature* **438**: 803-819  
3  
4 Montoya P, Ginsburg L, Alberdi MT et al (2006) Fossil large mammals from the early  
5 Pliocene locality of Alcoy (Spain) and their importance in biostratigraphy. *Geodiversitas*  
6 **28**: 137-173.  
7  
8 Pages, M, Calvignac S, Klein C et al (2008) Combined analysis of fourteen nuclear genes  
9 refines the Ursidae phylogeny *Mol. Phylogenet. Evol.* **47**: 73-83  
10  
11 Sato, JJ, Hosoda T, Wolsan M et al (2003) Phylogenetic relationships and divergence  
12 times among mustelids(Mammalia: Carnivora) based on nucleotide sequences of the  
13 nuclear interphotoreceptor retinoid binding protein and mitochondrial cytochrome b  
14 genes *Zool. Sci.* **20**: 243-264  
15  
16 Sato, JJ, Hosoda T, Wolsan M et al (2004) Molecular phylogeny of arctoids (Mammalia:  
17 Carnivora) with emphasis on phylogenetic and taxonomic positions of the ferret-badgers  
18 and skunks *Zool. Sci.* **21**: 111-118  
19  
20 Sato, JJ, Wolsan M, Minami S. et al (2009) Deciphering and dating the red panda's  
21 ancestry and early adaptive radiation of Musteloidea *Mol. Phylogenet. Evol.* **53**:907-922  
22  
23 Yonezawa, T, Nikaido M, Kohno N et al (2007) Molecular phylogenetic study on the  
24 origin and evolution of Mustelidae. *Gene* **396**: 1-12.  
25  
26 Yonezawa, T, Kohno N, Hasegawa, M. (2009) The monophyletic origin of sea lions and  
27 fur seals (Carnivora:Otariidae) in the southern hemisphere. *Gene* **441**:89-99.  
28  
29 Yu, L, Li, QW, Ryder, OA et al (2004) Phylogeny of the bears (Ursidae) based on  
30 nuclear and mitochondrial genes *Mol. Phylogenet. Evol.* **32**: 480-494  
31  
32  
33  
34  
35  
36  
37

1 **Supplementary Tables**

2

Table S1: Genbank accession numbers for sequences used in this study. Superscripts refer to references for original sequences (see footnote to table)

| Taxon                          | CHRNA1                | FES                   | GHR                   | IRBP                  | RAG1                  | RHO1                  |
|--------------------------------|-----------------------|-----------------------|-----------------------|-----------------------|-----------------------|-----------------------|
| <i>Canis lupus</i>             | DQ205757 <sup>c</sup> | DQ205795 <sup>c</sup> | DQ205836 <sup>c</sup> | DQ205906 <sup>c</sup> | AB371339 <sup>i</sup> | DQ205869 <sup>c</sup> |
| <i>Ursus americanus</i>        | DQ205726 <sup>c</sup> | DQ205766 <sup>c</sup> | DQ205799 <sup>c</sup> | AY303837 <sup>j</sup> | DQ240717 <sup>h</sup> | DQ205840 <sup>c</sup> |
| <i>Ursus arctos</i>            | GU931041 <sup>a</sup> | AM748322 <sup>j</sup> | GU931134 <sup>a</sup> | AY303842 <sup>j</sup> | AB109361 <sup>i</sup> | -                     |
| <i>Ursus maritimus</i>         | DQ205725 <sup>c</sup> | DQ205765 <sup>c</sup> | DQ205798 <sup>c</sup> | AY303843 <sup>j</sup> | -                     | DQ205839 <sup>c</sup> |
| <i>Hydrurga leptonyx</i>       | DQ205744 <sup>c</sup> | -                     | DQ205818 <sup>c</sup> | DQ205895 <sup>c</sup> | GU167539 <sup>d</sup> | DQ205857 <sup>c</sup> |
| <i>Mirounga angustirostris</i> | DQ205746 <sup>c</sup> | DQ205785 <sup>c</sup> | DQ205820 <sup>c</sup> | DQ205897 <sup>c</sup> | GU167540 <sup>d</sup> | DQ205859 <sup>c</sup> |
| <i>Monachus schaluinslandi</i> | DQ205747 <sup>c</sup> | DQ205786 <sup>c</sup> | DQ205821 <sup>c</sup> | DQ205898 <sup>c</sup> | GU167542 <sup>d</sup> | DQ205860 <sup>c</sup> |
| <i>Zalophus californianus</i>  | AB365084 <sup>n</sup> | AB365085 <sup>n</sup> | GU931126 <sup>a</sup> | AY750612 <sup>b</sup> | AB302263 <sup>m</sup> | AB365087 <sup>n</sup> |
| <i>Mephitis mephitis</i>       | DQ205733 <sup>c</sup> | -                     | DQ205805 <sup>c</sup> | AB109331 <sup>k</sup> | AB109358 <sup>k</sup> | DQ205846 <sup>c</sup> |
| <i>Procyon lotor</i>           | AF498152 <sup>e</sup> | AF498183 <sup>e</sup> | AF498207 <sup>e</sup> | AB082981 <sup>j</sup> | AB109359 <sup>k</sup> | AF498231 <sup>c</sup> |
| <i>Potos flavus</i>            | DQ205731 <sup>c</sup> | DQ205770 <sup>c</sup> | DQ205803 <sup>c</sup> | DQ205880 <sup>c</sup> | DQ660264 <sup>f</sup> | DQ205845 <sup>c</sup> |
| <i>Taxidea taxus</i>           | AF498148 <sup>e</sup> | AF498179 <sup>e</sup> | AF498203 <sup>e</sup> | DQ205885 <sup>c</sup> | DQ660271 <sup>f</sup> | AF498227 <sup>c</sup> |
| <i>Gulo gulo</i>               | AF498143 <sup>e</sup> | AF498170 <sup>e</sup> | AF498198 <sup>e</sup> | AB082962 <sup>j</sup> | AB109340 <sup>k</sup> | AF498222 <sup>e</sup> |
| <i>Mustela frenata</i>         | AF498139 <sup>e</sup> | AF498171 <sup>e</sup> | AF498194 <sup>e</sup> | DQ205886 <sup>c</sup> | EF472412 <sup>g</sup> | AF498218 <sup>c</sup> |
| <i>Neovison vison</i>          | AF498140 <sup>e</sup> | AF498163 <sup>e</sup> | AF498195 <sup>e</sup> | AB082977 <sup>j</sup> | DQ660268 <sup>f</sup> | AF498219 <sup>c</sup> |
| <i>Lontra canadensis</i>       | AF498132 <sup>e</sup> | AF498162 <sup>e</sup> | AF498187 <sup>e</sup> | DQ205884 <sup>c</sup> | EF472403 <sup>g</sup> | AF498211 <sup>e</sup> |
| <i>Enhydra lutris</i>          | AF498131 <sup>e</sup> |                       | AF498186 <sup>e</sup> | AB082978 <sup>j</sup> | GU167549 <sup>d</sup> | AF498210 <sup>e</sup> |

Sources: *a* Eizerik et al. (2010); *b* Flynn et al. (2005); *c* Fulton and Strobeck (2006); *d* Fulton and Strobeck (2010); *e* Koepfi and Wayne (2003); *f* Koepfli et al. (2007); *g* Koepfli et al. (2008); *h* Lindblad-Toh et al. (2005); *i* Pages et al. (2008); *j* Sato et al. (2003); *k* Sato et al. (2004); *l* Sato et al. (2009); *m* Yonezawa et al. (2007); *n* Yonezawa et al. (2009); *o* Yu et al. (2004)

3

4

Table S2: Fossil calibrations used in BEAST analysis, with distribution parameters. All priors were log-normally distributed.

| clade                         | fossil taxon                                   | offset  | median | 95%  |
|-------------------------------|------------------------------------------------|---------|--------|------|
| Caniformia                    | <i>Hesperocyon</i> sp                          | 40      | 41.5   | 50   |
| Arctoidea                     | <i>Parictis</i> sp.                            | 37      | 38     | 40   |
| Ursus                         | <i>Ursus americanus</i>                        | 1.8-2.9 | 2.9    | 5.3  |
| <i>Ursus maritimus/arctos</i> | <i>Ursus maritimus</i>                         | 0.17    | 1.13   | 5.3  |
| Pinnipedia+ Musteloidea       | <i>Enaliarctos tedfordi</i>                    | 28      | 29     | 33   |
| Crown Pinnipedia              | <i>Allodesmus kernensis</i>                    | 20.5    | 23     | 28   |
| <i>Lobodon+Mirounga</i>       | <i>Acrophoca</i> sp.                           | 5       | 7      | 17.3 |
| Procyonidae, Mustelidae       | <i>Broiliana</i> sp.                           | 24      | 25     | 28   |
| Lutrinae+Mustelinae           | Lutrinae indet./ <i>Vishnuonyx chinjiensis</i> | 13.7    | 15     | 16   |

5

6

1

Table S3: Regression statistics for independent contrasts of turbinate areas on contrast of three size measures (in italics).

| Regression            | DF | Slope | r <sup>2</sup> | p      |
|-----------------------|----|-------|----------------|--------|
| <i>Body mass</i>      |    |       |                |        |
| TSA                   | 14 | 0.62  | 0.82           | <0.001 |
| RSA                   | 14 | 0.69  | 0.73           | <0.001 |
| OSA                   | 14 | 0.50  | 0.60           | <0.001 |
| <i>Skull length</i>   |    |       |                |        |
| TSA                   | 14 | 1.95  | 0.76           | <0.001 |
| RSA                   | 14 | 2.27  | 0.75           | <0.001 |
| OSA                   | 14 | 1.63  | 0.59           | <0.001 |
| <i>Chamber Volume</i> |    |       |                |        |
| TSA                   | 14 | 0.84  | 0.83           | <0.001 |
| RSA                   | 14 | 0.95  | 0.83           | <0.001 |
| OSA                   | 14 | 0.71  | 0.70           | <0.001 |

1  
2

Table S4. Specimens scanned. **M, male; F, female; U, unknown.** Museum or source abbreviations as follows: H, Illinois State Museum; LACM, Museum of Natural History, Los Angeles; MVZ, Museum of Vertebrate Zoology, Berkeley; SO, Southwest Fisheries; UCLA; UCLA, Donald R. Dickey Collection, UCLA; USNM, United States National Museum.

| Genus           | Species               | Sex | ID NUM      |
|-----------------|-----------------------|-----|-------------|
| <i>Mephitis</i> | <i>mephitis</i>       | M   | USNM 47553  |
| <i>Mephitis</i> | <i>mephitis</i>       | F   | UCLA JXS001 |
| <i>Enhydra</i>  | <i>lutris</i>         | M   | SO 2951-98  |
| <i>Enhydra</i>  | <i>lutris</i>         | F   | SO 2853-97  |
| <i>Gulo</i>     | <i>gulo</i>           | M   | USNM 314885 |
| <i>Gulo</i>     | <i>gulo</i>           | F   | USNM 157327 |
| <i>Lontra</i>   | <i>canadensis</i>     | F   | UCLA 18958  |
| <i>Lontra</i>   | <i>canadensis</i>     | M   | UCLA 15275  |
| <i>Mustela</i>  | <i>frenata</i>        | F   | USNM 95054  |
| <i>Mustela</i>  | <i>frenata</i>        | M   | USNM 52702  |
| <i>Neovison</i> | <i>vison</i>          | M   | UCLA 8488   |
| <i>Taxidea</i>  | <i>taxus</i>          | M   | UCLA 14841  |
| <i>Taxidea</i>  | <i>taxus</i>          | F   | LACM 45012  |
| <i>Zalophus</i> | <i>californianus</i>  | M   | UCLA 252    |
| <i>Zalophus</i> | <i>californicus</i>   | F   | LACM 95730  |
| <i>Hydrurga</i> | <i>leptonyx</i>       | F   | USNM 269533 |
| <i>Hydrurga</i> | <i>leptonyx</i>       | M   | USNM 270326 |
| <i>Mirounga</i> | <i>angustirostris</i> | F   | MVZ 184140  |
| <i>Monachus</i> | <i>tropicalis</i>     | F   | USNM 102527 |
| <i>Monachus</i> | <i>tropicalis</i>     | M   | USNM 100358 |
| <i>Potos</i>    | <i>flavus</i>         | F   | USNM 337630 |
| <i>Potos</i>    | <i>flavus</i>         | M   | USNM 291066 |
| <i>Procyon</i>  | <i>lotor</i>          | M   | LACM 52261  |



|                |                       |   |             |
|----------------|-----------------------|---|-------------|
| <i>Procyon</i> | <i>lotor</i>          | F | LACM 07241  |
| <i>Ursus</i>   | <i>americanus</i>     | F | USNM 211397 |
| <i>Ursus</i>   | <i>americanus</i>     | M | USNM 227070 |
| <i>Ursus</i>   | <i>arctos</i>         | M | USNM 82003  |
| <i>Ursus</i>   | <i>arctos (skull)</i> | F | USNM 98062  |
| <i>Ursus</i>   | <i>maritimus</i>      | M | H 001-05    |
| <i>Ursus</i>   | <i>maritimus</i>      | U | USNM 275072 |

1  
2

1 *Supplementary Figures*

2  
3

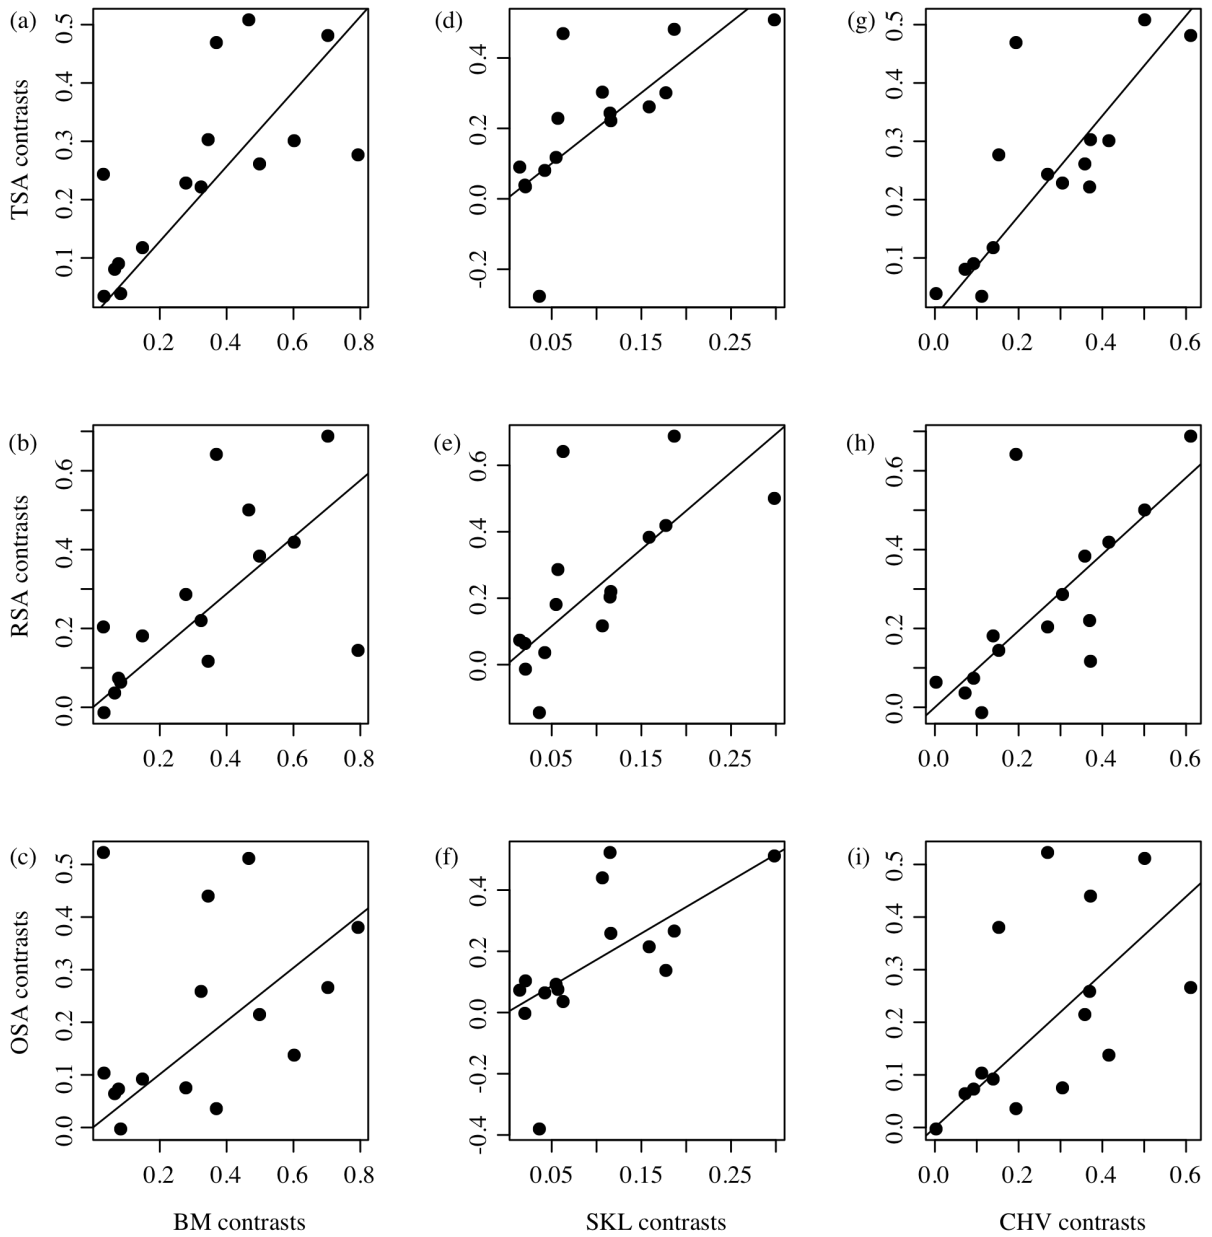

4  
5  
6  
7  
8  
9  
10  
11  
12  
13

Figure S1. Regressions of phylogenetic independent contrasts of total turbinate surface area (TSA, top row), respiratory surface area (RSA, middle row), and olfactory surface area (OSA, bottom row) on contrasts for body mass (BM, left column), skull length (SKL, middle column), and chamber volume (CHV, right column). All measures were natural log (ln) transformed prior to computation of contrasts.
